# Supplementary material
Source: PubMed Central journal article supplement (PMC4353671)
Supplement: NIHMS635045-supplement-1.pdf [file NIHMS635045-supplement-1.pdf]

**Table S1. Adjusted hazard ratio by quintiles of baseline urine NGAL concentration after excluding patients with history of cardiovascular disease (heart failure, MI, stroke and PAD)**

|                                                                         |                                    | Urine NGAL concentration (ng/ml)                         |                  |                  |                  |                  |
|-------------------------------------------------------------------------|------------------------------------|----------------------------------------------------------|------------------|------------------|------------------|------------------|
|                                                                         |                                    | ≤6.9                                                     | >6.9 - ≤12.9     | >12.9 - ≤22.6    | >22.6 - ≤49.5    | >49.5            |
| Heart failure events                                                    | No. of events                      | 12                                                       | 27               | 35               | 36               | 52               |
|                                                                         | Total number of years of follow-up | 2458.0                                                   | 2477.8           | 2249.5           | 2358.5           | 2037.1           |
|                                                                         | Event rates (per 100 person-years) | 0.49                                                     | 1.09             | 1.56             | 1.53             | 2.55             |
|                                                                         | Adjusted* Hazard ratio (95%CI)     | Ref                                                      | 2.12 (1.04-4.34) | 2.44 (1.29-4.98) | 1.81 (0.86-3.81) | 2.12 (0.99-4.50) |
|                                                                         | Adjusted* Hazard ratio (95%CI)     | 1.003 (0.987 - 1.020) per 0.1 increase in log urine NGAL |                  |                  |                  |                  |
| Ischemic atherosclerotic events (composite of MI, PAD, ischemic stroke) | No. of events                      | 17                                                       | 28               | 34               | 25               | 49               |
|                                                                         | Total number of years of follow-up | 2438.3                                                   | 2473.7           | 2237.8           | 2375.3           | 2069.3           |
|                                                                         | Event rates (per 100 person-years) | 0.70                                                     | 1.13             | 1.52             | 1.05             | 2.37             |
|                                                                         | Adjusted* Hazard ratio (95%CI)     | Ref                                                      | 1.57 (0.85-2.90) | 2.14 (1.15-3.99) | 1.45 (0.74-2.85) | 2.16 (1.27-4.82) |
|                                                                         | Adjusted* Hazard ratio (95%CI)     | 1.019 (1.003 - 1.035) per 0.1 increase in log urine NGAL |                  |                  |                  |                  |
| Deaths from all-causes                                                  | No. of events                      | 23                                                       | 42               | 57               | 37               | 50               |
|                                                                         | Total number of years of follow-up | 2585.5                                                   | 2635.9           | 2421.8           | 2574.2           | 2315.0           |
|                                                                         | Event rates (per 100 person-years) | 0.89                                                     | 1.59             | 2.35             | 1.44             | 2.16             |
|                                                                         | Adjusted* Hazard ratio (95%CI)     | Ref                                                      | 1.51 (0.90-2.54) | 1.98 (1.18-3.33) | 1.04 (0.59-1.85) | 1.16 (0.64-2.09) |
|                                                                         | Adjusted* Hazard ratio (95%CI)     | 0.995 (0.981 - 1.009) per 0.1 increase in log urine NGAL |                  |                  |                  |                  |

\*Adjusted for age, sex, race/ethnicity, estimated glomerular filtration rate , 24-hour urine albumin, diabetes mellitus, smoking status, blood pressure, body mass index, LDL cholesterol, HDL cholesterol, use of angiotensin-converting enzyme inhibitors, angiotensin receptor blockers, aldosterone receptor antagonists, statin and antiplatelet agents
