# Supplementary material
Source: PubMed Central journal article supplement (PMC4353671)
Supplement: NIHMS635045-supplement-2.pdf [file NIHMS635045-supplement-2.pdf]

**Table S2. Adjusted hazard ratio by quintiles of baseline urine NGAL/creatinine ratio**

|                                                                         |                                | Urine NGAL/creatinine ratio (ng/ml per mg/dl)                             |                  |                  |                  |                  |
|-------------------------------------------------------------------------|--------------------------------|---------------------------------------------------------------------------|------------------|------------------|------------------|------------------|
|                                                                         |                                | ≤0.09                                                                     | >0.09 -≤0.19     | >0.19 - ≤0.37    | >0.37 - ≤0.89    | >0.89            |
| Heart failure events                                                    | Adjusted* Hazard ratio (95%CI) | Ref                                                                       | 1.48 (0.99-2.20) | 1.48 (0.98-2.22) | 1.67 (1.09-2.55) | 1.42 (0.90-2.23) |
|                                                                         | Adjusted* Hazard ratio (95%CI) | 1.002 (0.993 - 1.012) per 0.1 increase in log urine NGAL/creatinine ratio |                  |                  |                  |                  |
| Ischemic atherosclerotic events (composite of MI, PAD, ischemic stroke) | Adjusted* Hazard ratio (95%CI) | Ref                                                                       | 1.14 (0.77-1.69) | 1.61 (1.08-2.38) | 1.81 (1.19-2.76) | 1.78 (1.13-2.78) |
|                                                                         | Adjusted* Hazard ratio (95%CI) | 1.014 (1.004 - 1.024) per 0.1 increase in log urine NGAL/creatinine ratio |                  |                  |                  |                  |
| Deaths from all-causes                                                  | Adjusted* Hazard ratio (95%CI) | Ref                                                                       | 1.39 (0.99-1.92) | 1.51 (1.07-2.13) | 1.44 (0.99-2.08) | 1.70 (1.17-2.48) |
|                                                                         | Adjusted* Hazard ratio (95%CI) | 1.010 (1.002- 1.018) per 0.1 increase in log urine NGAL/creatinine ratio  |                  |                  |                  |                  |

\*Adjusted for age, sex, race/ethnicity, estimated glomerular filtration rate , 24-hour urine albumin, diabetes mellitus, smoking status, prior history of myocardial infarction, history of coronary revascularization, history of heart failure, history of ischemic stroke, history of peripheral arterial disease, blood pressure, body mass index, LDL cholesterol, HDL cholesterol, use of angiotensin-converting enzyme inhibitors, angiotensin receptor blockers, aldosterone receptor antagonists, statin and antiplatelet agents
