# Supplementary material
Source: PubMed Central journal article supplement (PMC4353671)
Supplement: NIHMS635045-supplement-3.pdf [file NIHMS635045-supplement-3.pdf]

**Table S3. Ischemic atherosclerotic events separated into MI, PAD and ischemic stroke: number of events, and event rate by quintiles of baseline urine NGAL concentration (a patient could have more than one event)**

|                 |                                    | Urine NGAL concentration (ng/ml) |              |               |               |        |
|-----------------|------------------------------------|----------------------------------|--------------|---------------|---------------|--------|
|                 |                                    | ≤6.9                             | >6.9 - ≤12.9 | >12.9 - ≤22.6 | >22.6 - ≤49.5 | >49.5  |
| MI              | No. of events                      | 31                               | 44           | 40            | 41            | 57     |
|                 | Total number of years of follow-up | 3571.9                           | 3464.4       | 3371.7        | 3417.2        | 3165.2 |
|                 | Event rates (per 100 person-years) | 0.87                             | 1.27         | 1.19          | 1.20          | 1.80   |
| PAD             | No. of events                      | 12                               | 18           | 10            | 20            | 46     |
|                 | Total number of years of follow-up | 3627.9                           | 3528.8       | 3451.7        | 3493.9        | 3181.9 |
|                 | Event rates (per 100 person-years) | 0.33                             | 0.51         | 0.29          | 0.57          | 1.45   |
| Ischemic stroke | No. of events                      | 9                                | 13           | 19            | 27            | 22     |
|                 | Total number of years of follow-up | 3626.8                           | 3542.0       | 3416.5        | 3454.0        | 3250.3 |
|                 | Event rates (per 100 person-years) | 0.25                             | 0.37         | 0.56          | 0.78          | 0.68   |
